# Supplementary material
Source: publisher site journal article supplement (https://www.spandidos-publications.com/6986/downloadSupplementary)
Supplement: Supplementary file 1 [file downloadSupplementary]

## Sheet: Table S2 hub gene rank based on
Table SII. Top 10 in network string interactions short.tsv ranked by the Maximal Clique Centrality method.
Rank	Name	Score
1	IL33	3
1	LYVE1	3
3	CFTR	2
3	STAB2	2
5	FGF7	1
5	HBD	1
5	SLC4A1	1
5	TNFSF15	1
5	ABCB5	1
5	ITGB6	1
